# Supplementary material
Source: HighWire-hosted journal article supplement (https://erj.ersjournals.com/content/55/5/2000547)
Supplement: inline-supplementary-material-2 [file inline-supplementary-material-2.pdf]

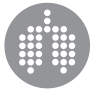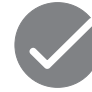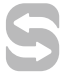

SHAREABLE PDF

# Comorbidity and its impact on 1590 patients with COVID-19 in China: a nationwide analysis

Wei-jie Guan<sup>1,26</sup>, Wen-hua Liang<sup>2,26</sup>, Yi Zhao<sup>2,26</sup>, Heng-rui Liang<sup>2,26</sup>, Zi-sheng Chen<sup>2,3,26</sup>, Yi-min Li<sup>4</sup>, Xiao-qing Liu<sup>4</sup>, Ru-chong Chen<sup>1</sup>, Chun-li Tang<sup>1</sup>, Tao Wang<sup>1</sup>, Chun-quan Ou<sup>5</sup>, Li Li<sup>5</sup>, Ping-yan Chen<sup>5</sup>, Ling Sang<sup>4</sup>, Wei Wang<sup>2</sup>, Jian-fu Li<sup>2</sup>, Cai-chen Li<sup>2</sup>, Li-min Ou<sup>2</sup>, Bo Cheng<sup>2</sup>, Shan Xiong<sup>2</sup>, Zheng-yi Ni<sup>6</sup>, Jie Xiang<sup>6</sup>, Yu Hu<sup>7</sup>, Lei Liu<sup>8,9</sup>, Hong Shan<sup>10</sup>, Chun-liang Lei<sup>11</sup>, Yi-xiang Peng<sup>12</sup>, Li Wei<sup>13</sup>, Yong Liu<sup>14</sup>, Ya-hua Hu<sup>15</sup>, Peng Peng<sup>16</sup>, Jian-ming Wang<sup>17</sup>, Ji-yang Liu<sup>18</sup>, Zhong Chen<sup>19</sup>, Gang Li<sup>20</sup>, Zhi-jian Zheng<sup>21</sup>, Shao-qin Qiu<sup>22</sup>, Jie Luo<sup>23</sup>, Chang-jiang Ye<sup>24</sup>, Shao-yong Zhu<sup>25</sup>, Lin-ling Cheng<sup>1</sup>, Feng Ye<sup>1</sup>, Shi-yue Li<sup>1</sup>, Jin-ping Zheng<sup>1</sup>, Nuo-fu Zhang<sup>1</sup>, Nan-shan Zhong<sup>1</sup> and Jian-xing He<sup>2</sup>, on behalf of the China Medical Treatment Expert Group for COVID-19

**Affiliations:** <sup>1</sup>State Key Laboratory of Respiratory Disease and National Clinical Research Center for Respiratory Disease, the First Affiliated Hospital of Guangzhou Medical University, Guangzhou Medical University, Guangzhou, China. <sup>2</sup>Dept of Thoracic Oncology and Surgery, China State Key Laboratory of Respiratory Disease and National Clinical Research Center for Respiratory Disease, the First Affiliated Hospital of Guangzhou Medical University, Guangzhou, China. <sup>3</sup>The sixth Affiliated Hospital of Guangzhou Medical University, Qingyuan, China. <sup>4</sup>Dept of Pulmonary and Critical Care Medicine, China State Key Laboratory of Respiratory Disease and National Clinical Research Center for Respiratory Disease, the First Affiliated Hospital of Guangzhou Medical University, Guangzhou, China. <sup>5</sup>State Key Laboratory of Organ Failure Research, Dept of Biostatistics, Guangdong Provincial Key Laboratory of Tropical Disease Research, School of Public Health, Southern Medical University, Guangzhou, China. <sup>6</sup>Wuhan Jin-yintan Hospital, Wuhan, China. <sup>7</sup>Union Hospital, Tongji Medical College, Huazhong University of Science and Technology, Wuhan, China. <sup>8</sup>Shenzhen Third People's Hospital, Shenzhen, China. <sup>9</sup>The Second Affiliated Hospital of Southern University of Science and Technology, National Clinical Research Center for Infectious Diseases, Shenzhen, China. <sup>10</sup>The Fifth Affiliated Hospital of Sun Yat-sen University, Zhuhai, China. <sup>11</sup>Guangzhou Eighth People's Hospital, Guangzhou Medical University, Guangzhou, China. <sup>12</sup>The Central Hospital of Wuhan, Wuhan, China. <sup>13</sup>Wuhan No. 1 Hospital, Wuhan Hospital of Traditional Chinese and Western Medicine, Wuhan, China. <sup>14</sup>Chengdu Public Health Clinical Medical Center, Chengdu, China. <sup>15</sup>Huangshi Central Hospital of Edong Healthcare Group, Affiliated Hospital of Hubei Polytechnic University, Huangshi, China. <sup>16</sup>Wuhan Pulmonary Hospital, Wuhan, China. <sup>17</sup>Tianyou Hospital Affiliated to Wuhan University of Science and Technology, Wuhan, China. <sup>18</sup>The First Hospital of Changsha, Changsha, China. <sup>19</sup>The Third People's Hospital of Hainan Province, Sanya, China. <sup>20</sup>Huanggang Central Hospital, Huanggang, China. <sup>21</sup>Wenling First People's Hospital, Wenling, China. <sup>22</sup>The Third People's Hospital of Yichang, Yichang, China. <sup>23</sup>Affiliated Taihe Hospital of Hubei University of Medicine, Shiyan, China. <sup>24</sup>Xiantao First People's Hospital, Xiantao, China. <sup>25</sup>The People's Hospital of Huangpi District, Wuhan, China. <sup>26</sup>These authors are joint first authors.

**Correspondence:** Jian-xing He, Dept of Thoracic Surgery, the First Affiliated Hospital of Guangzhou Medical University; China State Key Laboratory of Respiratory Disease and National Clinical Research Center for Respiratory Disease, Guangzhou, China. E-mail: drjianxing.he@gmail.com; Nan-Shan Zhong, State Key Laboratory of Respiratory Disease, National Clinical Research Center for Respiratory Disease, Guangzhou Institute of Respiratory Health, The First Affiliated Hospital of Guangzhou Medical University, 151 Yanjiang Road, Guangzhou, China. E-mail: nanshan@vip.163.com

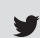

@ERSpublications

**The presence and number of comorbidities predict clinical outcomes of COVID-19**<http://bit.ly/3b9ibw5>

**Cite this article as:** Guan W-j, Liang W-h, Zhao Y, *et al.* Comorbidity and its impact on 1590 patients with COVID-19 in China: a nationwide analysis. *Eur Respir J* 2020; 55: 2000547 [<https://doi.org/10.1183/13993003.00547-2020>].

This single-page version can be shared freely online.

#### ABSTRACT

**Background:** The coronavirus disease 2019 (COVID-19) outbreak is evolving rapidly worldwide.

**Objective:** To evaluate the risk of serious adverse outcomes in patients with COVID-19 by stratifying the comorbidity status.

**Methods:** We analysed data from 1590 laboratory confirmed hospitalised patients from 575 hospitals in 31 provinces/autonomous regions/provincial municipalities across mainland China between 11 December 2019 and 31 January 2020. We analysed the composite end-points, which consisted of admission to an intensive care unit, invasive ventilation or death. The risk of reaching the composite end-points was compared according to the presence and number of comorbidities.

**Results:** The mean age was 48.9 years and 686 (42.7%) patients were female. Severe cases accounted for 16.0% of the study population. 131 (8.2%) patients reached the composite end-points. 399 (25.1%) reported having at least one comorbidity. The most prevalent comorbidity was hypertension (16.9%), followed by diabetes (8.2%). 130 (8.2%) patients reported having two or more comorbidities. After adjusting for age and smoking status, COPD (HR (95% CI) 2.681 (1.424–5.048)), diabetes (1.59 (1.03–2.45)), hypertension (1.58 (1.07–2.32)) and malignancy (3.50 (1.60–7.64)) were risk factors of reaching the composite end-points. The hazard ratio (95% CI) was 1.79 (1.16–2.77) among patients with at least one comorbidity and 2.59 (1.61–4.17) among patients with two or more comorbidities.

**Conclusion:** Among laboratory confirmed cases of COVID-19, patients with any comorbidity yielded poorer clinical outcomes than those without. A greater number of comorbidities also correlated with poorer clinical outcomes.
